# Supplementary material
Source: PubMed Central journal article supplement (PMC2915406)
Supplement: neo1208_0618SD1.pdf [file neo1208_0618SD1.pdf]

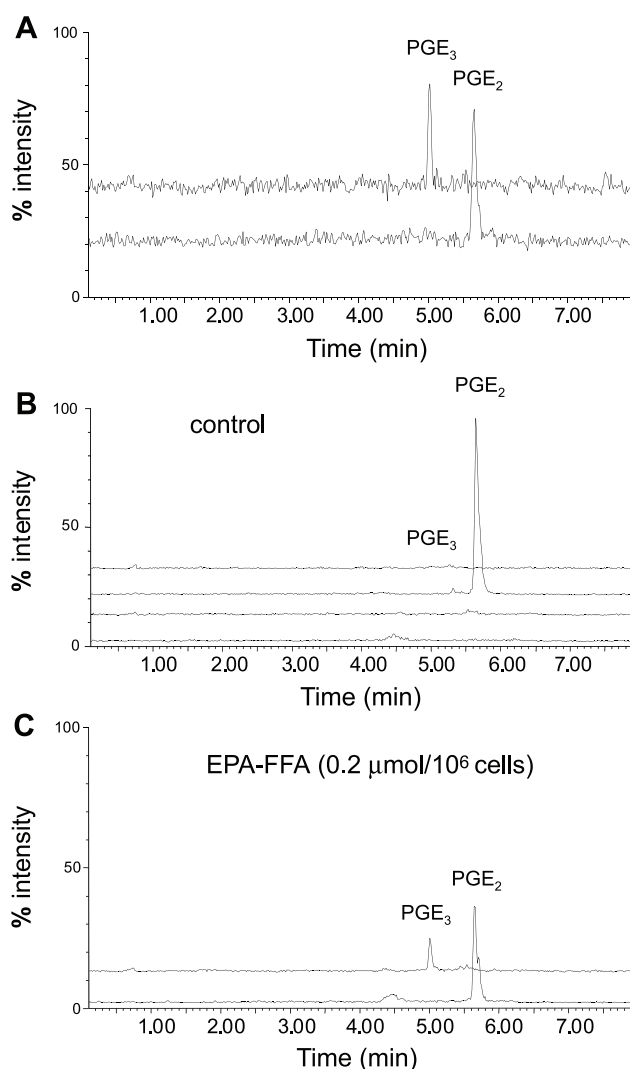

**Figure W1.** LC/MS/MS measurement of PGE<sub>2</sub> and PGE<sub>3</sub> in HCA-7 human CRC cell-conditioned medium. (A) Chromatogram of authentic PGE<sub>2</sub> (100 ng/ml) and PGE<sub>3</sub> (50 ng/ml) running at 5.7 and 5.0 minutes, respectively. (B) Chromatograms of extracted cell culture medium. The lower traces are PGE<sub>3</sub> and PGE<sub>2</sub> channels for unconditioned medium. The top two traces are PGE<sub>3</sub> and PGE<sub>2</sub> channels for medium conditioned by cells cultured in the presence of 95% (vol./vol.) ethanol carrier alone for 24 hours. Note the absence of a PGE<sub>3</sub> peak and a large PGE<sub>2</sub> peak. (C) Chromatograms of extracted conditioned medium from cells cultured in the presence of EPA-FFA (0.2 μmol/10<sup>6</sup> cells [equivalent to a 50-μM concentration]) for 24 hours. PGE<sub>3</sub> is now present in conditioned medium along with lesser amounts of PGE<sub>2</sub> compared with medium conditioned in the absence of EPA-FFA (compare with B).

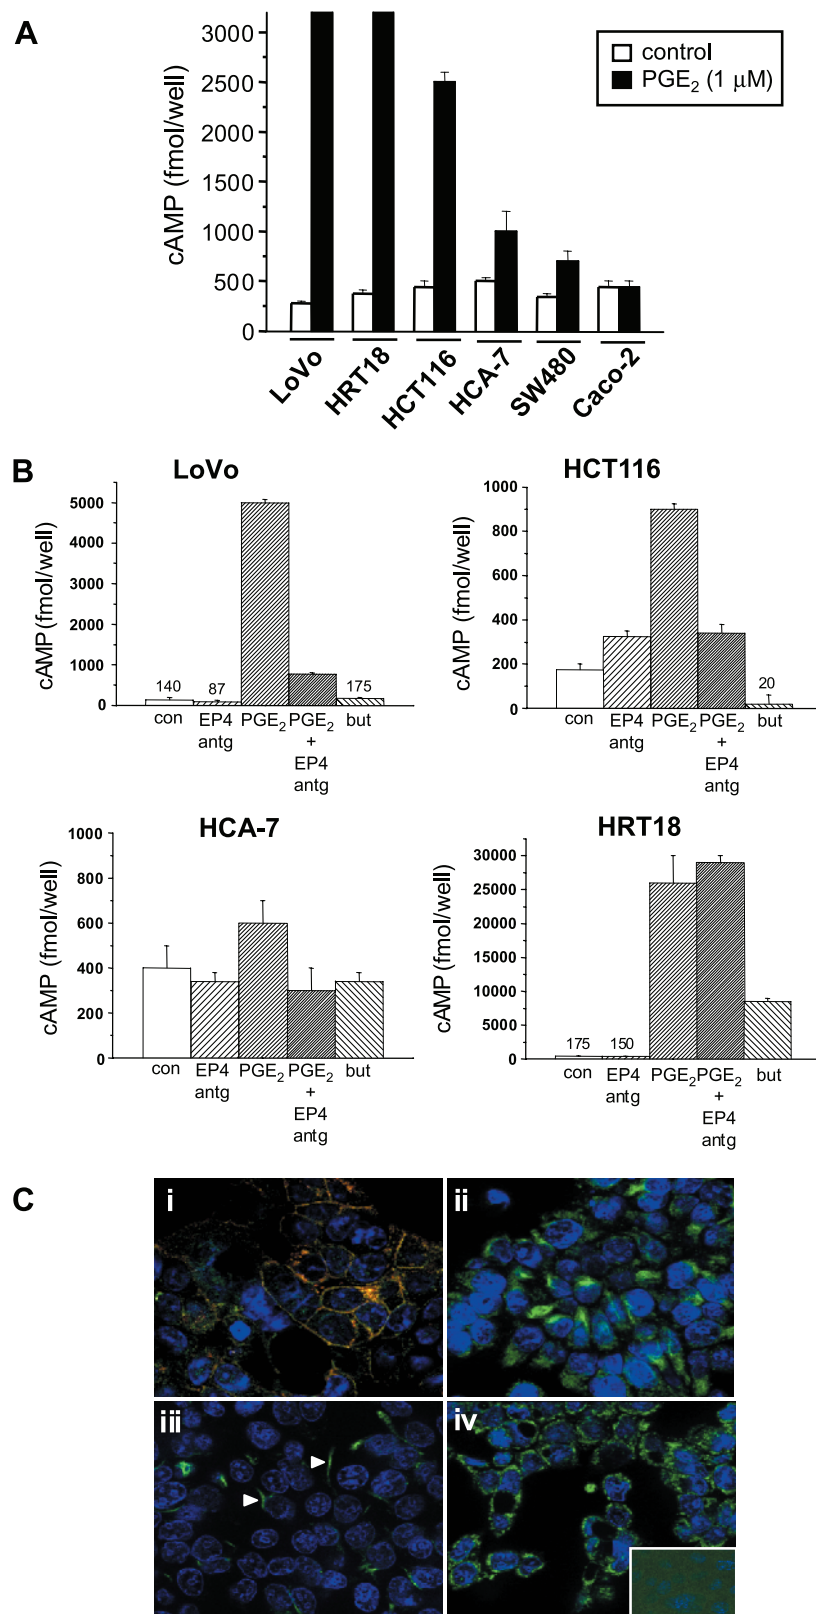

**Figure W2.** EP4 receptor signaling in human CRC cells. (A) Human CRC cell lines that generated a PGE<sub>2</sub>-induced increase in intracellular cAMP at 5 minutes were identified. (B) cAMP induction by PGE<sub>2</sub> (1 μM) was inhibited by the EP4 receptor antagonist (EP4 antg) ONO-AE3-208 (10 μM) but not mimicked by the EP2 receptor agonist butaprost (but; 1 μM) in LoVo, HCT116, and HCA-7 cells, confirming dominant PGE<sub>2</sub>-EP4 receptor signaling in these human CRC cell lines (but not HRT18). (C) Immunofluorescence detection of EP4 receptor protein in i) HT-29-EP4 cells (membranous colocalization [yellow] of anti-V5 tag [red] and EP4 receptor [green]), ii) and iii) LoVo cells demonstrating cytoplasmic and membranous localization (arrowheads), and iv) PGE<sub>2</sub> (1 μM)-treated LoVo cells demonstrating ligand-induced receptor internalization (inset—no primary antibody control).
